# Supplementary material
Source: PubMed Central journal article supplement (PMC8185182)
Supplement: mmc1.pdf [file mmc1.pdf]

**Supplemental information**

**Analysis of SARS-CoV-2 variant mutations reveals  
neutralization escape mechanisms and the ability  
to use ACE2 receptors from additional species**

**Ruoke Wang, Qi Zhang, Jiwan Ge, Wenlin Ren, Rui Zhang, Jun Lan, Bin Ju, Bin Su, Fengting Yu, Peng Chen, Huiyu Liao, Yingmei Feng, Xuemei Li, Xuanling Shi, Zheng Zhang, Fujie Zhang, Qiang Ding, Tong Zhang, Xinquan Wang, and Linqi Zhang**

## Supplemental Information titles and legends

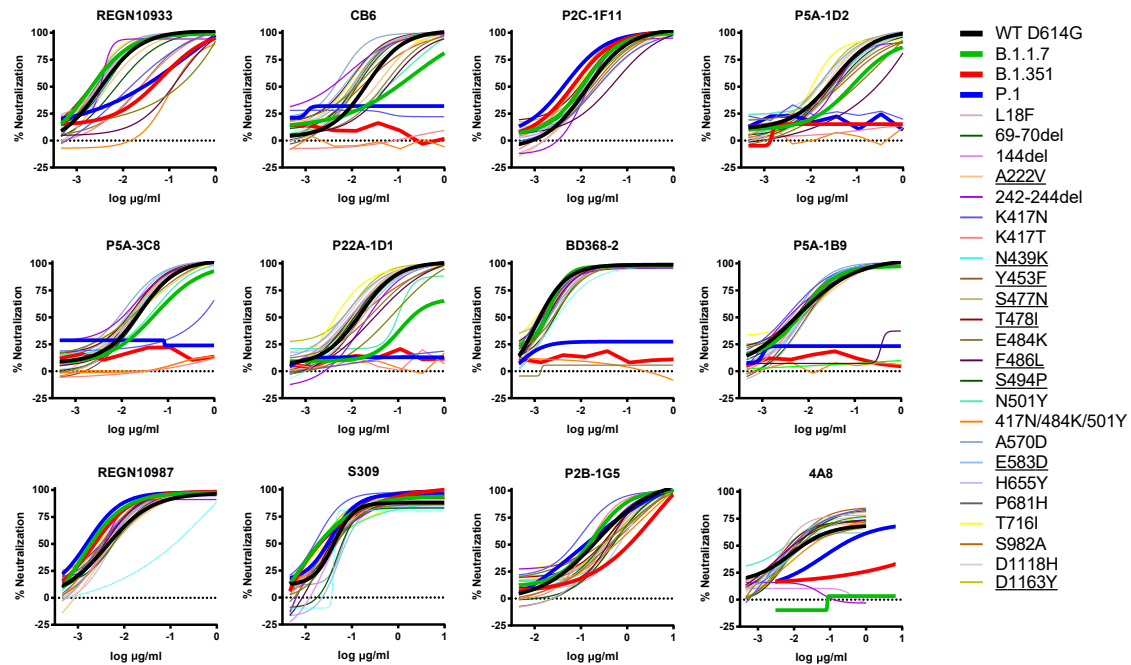

**Figure S1.**

### Neutralization of SARS-CoV-2 variants by each antibody, related to

**Figure 1.** Pseudoviruses bearing the indicated mutations were tested against serial dilutions of each mAb. Neutralizing activity was defined as the percent reduction in luciferase activities compared to no antibody controls. Levels of resistance were calculated as the -fold change in IC50 between each mutant and WT D614G, as presented in Figure 1C. Results were calculated from three independent experiments.

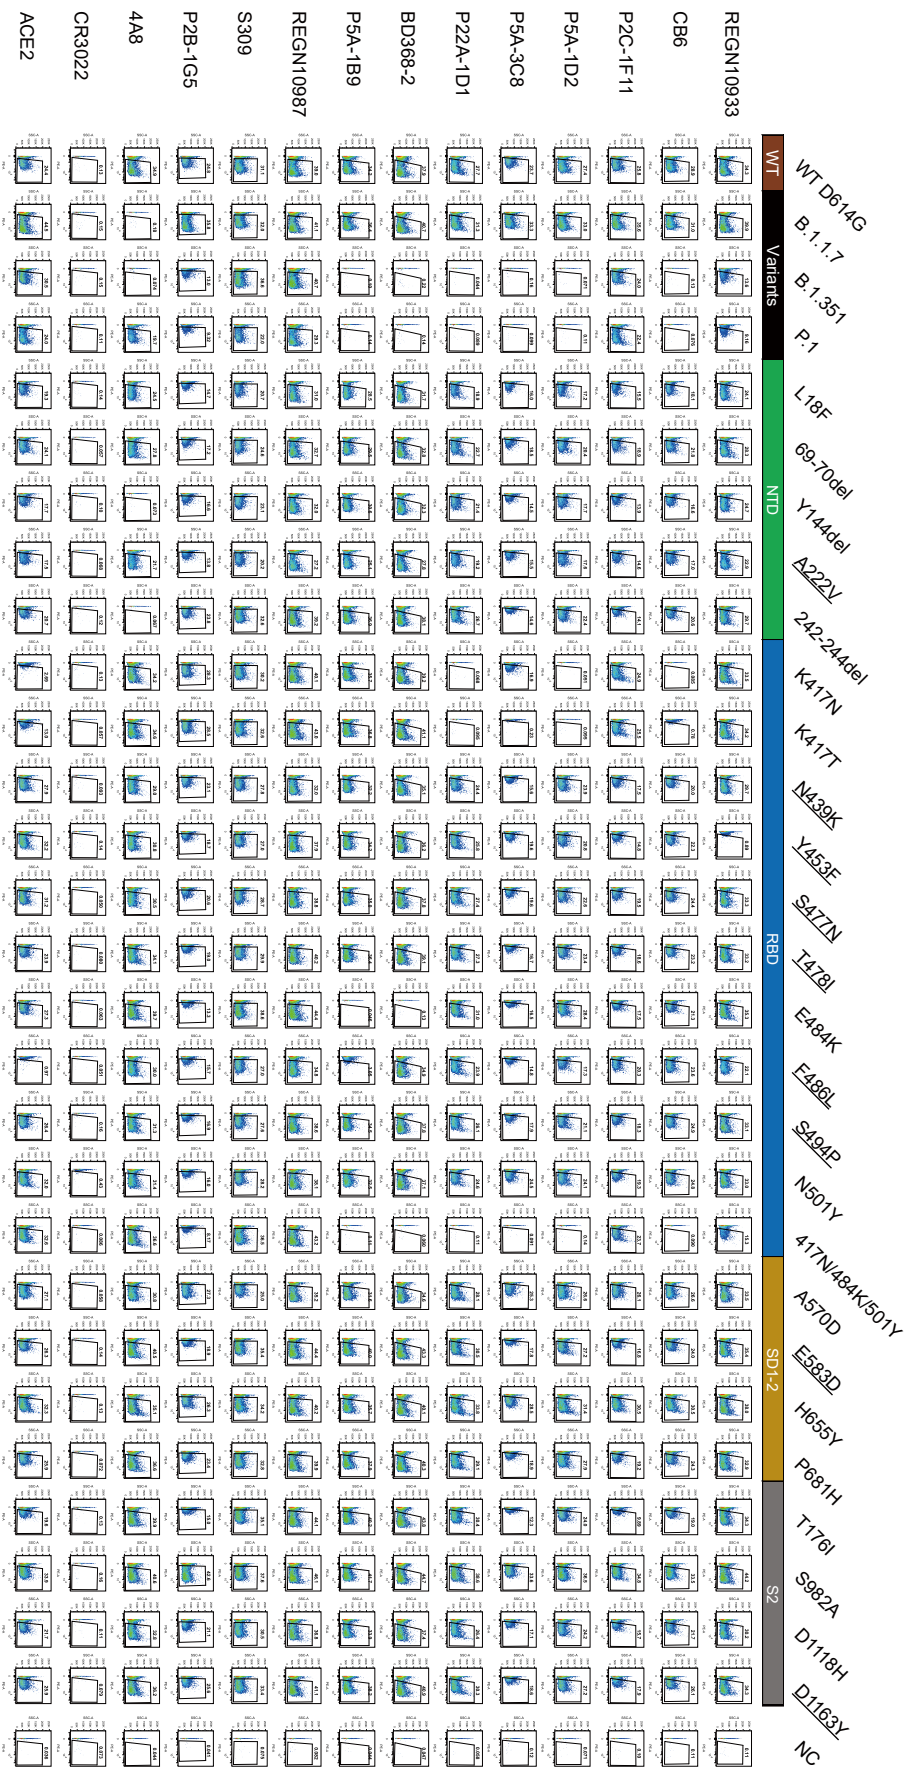

## **Figure S2.**

**Binding to cell surface expressed SARS-CoV-2 variants by each antibody, related to Figure 1.** Wildtype and mutant S proteins were expressed on the surface of HEK 293T, incubated with the mAbs or human soluble ACE2 under study, followed by staining with anti-human IgG Fc PE or anti-his PE, and analyzed by FACS. The gated cell percentages are shown. The fold changes in antibody binding, as shown in Figure 1D, was determined by comparing the total MFI in the selected gate between S variants and WT D614G. Data shown were calculated from three independent experiments. CR3022 is a negative control antibody. NC is HEK 293T cells with mock transfection.



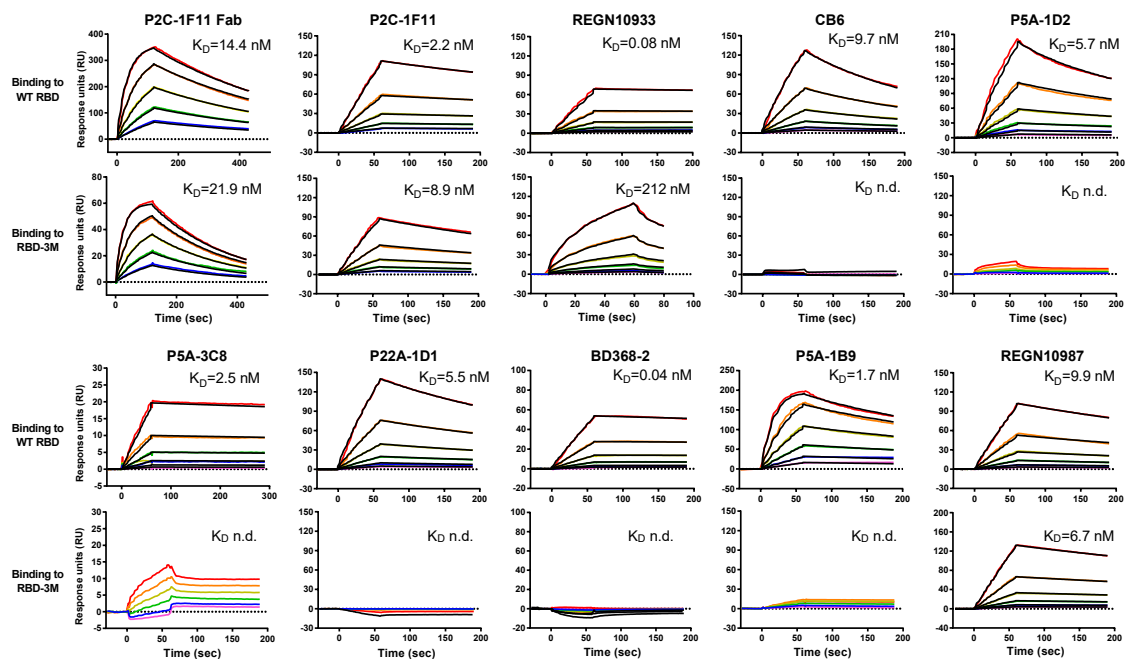

**Figure S3.**

**Binding kinetics of mAb to WT RBD and RBD-3M measured by SPR, related to Figure 2.** The Fab and IgG form of mAbs were immobilized on a CM5 sensor and serial concentrations of either wildtype RBD or mutant RBD-3M were flowed through the system. Colored lines indicate the experimentally derived curves. Black lines represent best fitted curves based on the experimental data. The calculated  $K_D$ s for each mAb are shown against WT RBD and mutant RBD-3M. The names of mAb tested are indicated at the top of each graph.

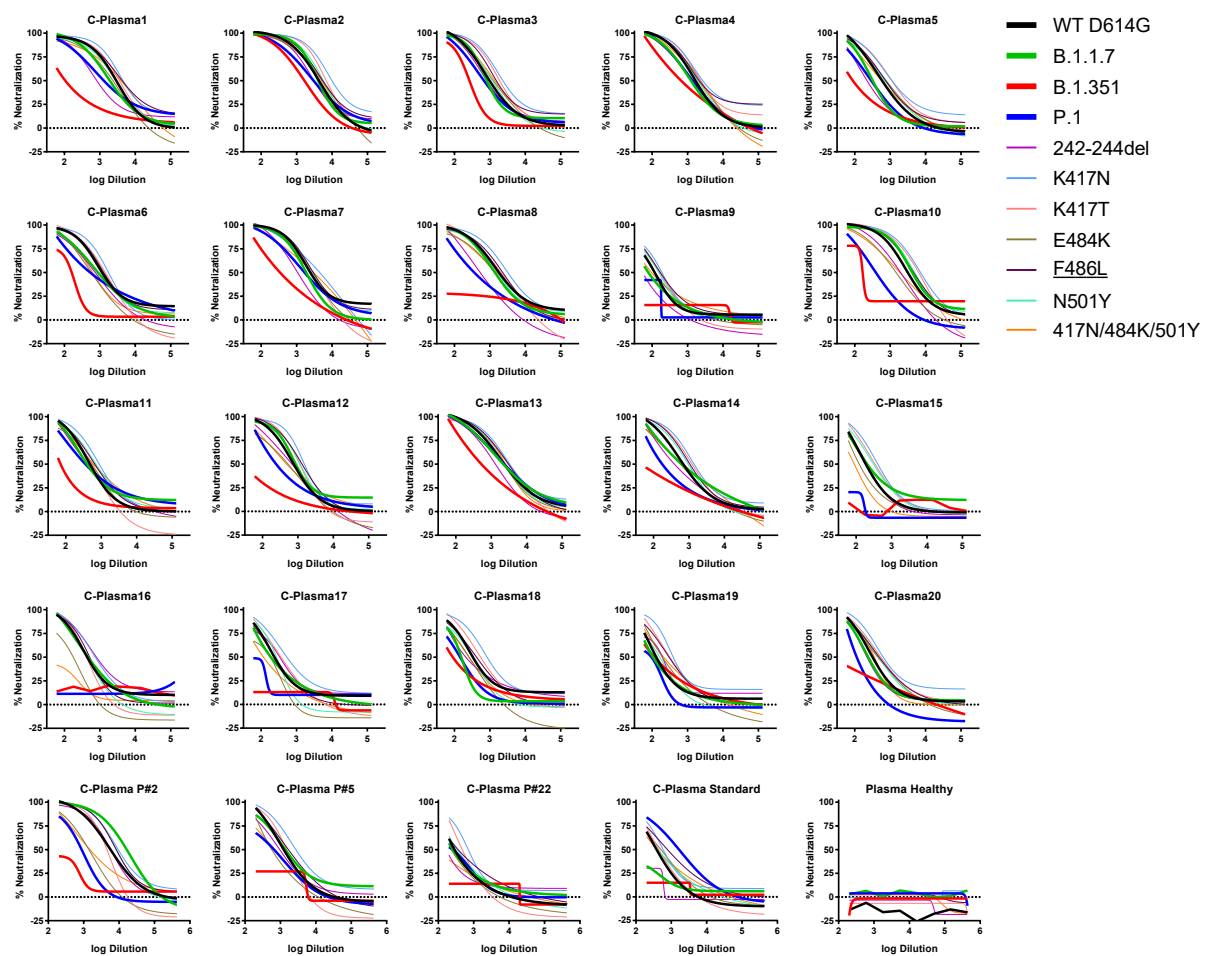

**Figure S4.**

**Neutralization of SARS-CoV-2 variants by each convalescent plasma, related to Figure 3.** Pseudoviruses bearing the indicated mutations were tested against serial dilutions of convalescent plasma. Neutralization activity was defined as the percent reduction in luciferase activity relative to no serum control. The actual ID<sub>50</sub> and the -fold changes between each mutant and WT D614G pseudovirus were calculated to estimate the resistance levels shown in Figure 3. Results were calculated from three independent experiments.

**Table S1. Data collection and refinement statistics (molecular replacement), related to Figure 2.**

| RBD-K417N-E484K-N501Y-P2C-1F11 complex               |                                       |
|------------------------------------------------------|---------------------------------------|
| <b>Data collection</b>                               |                                       |
| Space group                                          | C2                                    |
| Cell dimensions                                      |                                       |
| <i>a</i> , <i>b</i> , <i>c</i> (Å)                   | 195.844, 85.973, 57.872               |
| <i>a</i> , <i>b</i> , <i>g</i> (°)                   | 90, 99.75, 90                         |
| Resolution (Å)                                       | 50.00-2.094 (2.15-2.094) <sup>a</sup> |
| Unique reflections                                   | 50710 (3033)                          |
| <i>R</i> <sub>sym</sub> or <i>R</i> <sub>merge</sub> | 0.088(0.384)                          |
| <i>I</i> / <i>sI</i>                                 | 17.2(3.2)                             |
| Completeness (%)                                     | 90.92 (54.79)                         |
| CC <sub>1/2</sub> (%)                                | 99.7 (76.2)                           |
| Redundancy                                           | 5.3 (2.3)                             |
| <b>Refinement</b>                                    |                                       |
| Resolution (Å)                                       | 20.98-2.094                           |
| No. reflections                                      | 50684                                 |
| <i>R</i> <sub>work</sub> / <i>R</i> <sub>free</sub>  | 16.9/19.7                             |
| No. atoms                                            |                                       |
| Protein                                              | 4728                                  |
| Ligand/ion                                           | 14                                    |
| Water                                                | 505                                   |
| <i>B</i> -factors                                    |                                       |
| Protein                                              | 41.18                                 |
| Ligand/ion                                           | 81.75                                 |
| Water                                                | 46.02                                 |
| R.m.s. deviations                                    |                                       |
| Bond lengths (Å)                                     | 0.007                                 |
| Bond angles (°)                                      | 0.89                                  |
| Ramachandran statistics (%)                          |                                       |
| Favored                                              | 97.19                                 |
| Allowed                                              | 2.64                                  |
| Disallowed                                           | 0.17                                  |

<sup>a</sup> One crystal for the data, values in parentheses are for highest-resolution shell.

**Table S2. Molecular interaction between P2C-1F11 and mutant RBD-K417N-E484K-N501Y, related to Figure 2.**

|                        |               | <b>P2C-1F11</b> | <b>Length (Å)</b> | <b>Interactions</b> |
|------------------------|---------------|-----------------|-------------------|---------------------|
| <b>P2C-1F11/RBD</b>    | E/K417/N[N]   | H/Y52/CE2[C]    | 3.84              | Hydrogen bond       |
|                        |               | H/Y52/OH[O]     | 3.87              |                     |
|                        | E/K417/CG[C]  | H/Y52/CE2[C]    | 3.85              |                     |
|                        |               | H/Y52/CZ[C]     | 3.97              |                     |
|                        |               | H/Y52/OH[O]     | 3.32              |                     |
|                        | E/K417/CE[C]  | H/Y52/OH[O]     | 3.69              |                     |
|                        | E/K417/NZ[N]  | H/Y52/OH[O]     | 3.19              |                     |
|                        | E/K417/CD[C]  | H/Y33/OH[O]     | 4.02              |                     |
|                        | E/K417/CE/[C] | H/Y33/OH[O]     | 4.03              |                     |
| <b>P2C-1F11/RBD-3M</b> | E/N417/N[N]   | H/Y52/CE2[C]    | 3.82              |                     |
|                        |               | H/Y52/OH[O]     | 3.53              |                     |
|                        | E/Y453/CE1[C] | L/Y33/OH[O]     | 3.50              |                     |
|                        | E/Y453/CZ[C]  | L/Y33/OH[O]     | 3.43              |                     |
|                        | E/Y453/OH[O]  | L/Y33/CE1[C]    | 3.58              |                     |
|                        |               | L/Y33/CZ[C]     | 3.47              |                     |
|                        |               | L/Y33/OH[O]     | 2.52              |                     |
|                        | E/Q493/CG[C]  | L/Y33/OH[O]     | 3.62              |                     |
|                        | E/Q493/NE2[N] | L/S32/CB[C]     | 3.96              |                     |
|                        |               | L/S32/OG/[O]    | 3.77              |                     |
|                        | E/T500/C[C]   | L/S28/OG[O]     | 3.90              |                     |
|                        | E/T500/O[O]   | L/S28/CB[C]     | 3.30              |                     |
|                        |               | L/S28/OG[O]     | 3.01              |                     |
|                        | E/Y501/CA[C]  | L/S28/OG[O]     | 3.87              |                     |
|                        | E/Y501/CE1[C] | L/V29/O[O]      | 3.79              |                     |
|                        | E/Y501/CZ[C]  | L/S30/CA[C]     | 3.94              |                     |
|                        | E/Y501/OH[O]  | L/S30/CA[C]     | 3.82              |                     |
|                        |               | L/S30/CB[C]     | 3.85              |                     |
| L/S30/OG[O]            |               | 3.85            |                   |                     |

**Table S3. Information of the study subjects, related to Figure 3.**

| Patients      | Gender | Age | Severity |
|---------------|--------|-----|----------|
| C-Plasma1     | male   | 60  | severe   |
| C-Plasma2     | male   | 57  | severe   |
| C-Plasma3     | male   | 57  | severe   |
| C-Plasma4     | female | 81  | severe   |
| C-Plasma5     | female | 62  | mild     |
| C-Plasma6     | male   | 35  | mild     |
| C-Plasma7     | male   | 55  | mild     |
| C-Plasma8     | female | 52  | mild     |
| C-Plasma9     | female | 36  | mild     |
| C-Plasma10    | male   | 63  | mild     |
| C-Plasma11    | female | 63  | severe   |
| C-Plasma12    | male   | 75  | mild     |
| C-Plasma13    | male   | 78  | severe   |
| C-Plasma14    | male   | 62  | mild     |
| C-Plasma15    | male   | 30  | mild     |
| C-Plasma16    | male   | 30  | mild     |
| C-Plasma17    | female | 29  | mild     |
| C-Plasma18    | female | 43  | mild     |
| C-Plasma19    | male   | 58  | mild     |
| C-Plasma20    | female | 67  | severe   |
| C-Plasma P#2  | female | 65  | severe   |
| C-Plasma P#5  | female | 63  | severe   |
| C-Plasma P#22 | male   | 62  | mild     |

**Table S4. Primers used in the construction of mutated clones of SARS-CoV-2 S, related to Figure 1.**

| No. | Primer Name                | sequence                                                                |
|-----|----------------------------|-------------------------------------------------------------------------|
| 1   | Mut-1stMS-F                | TTGGTACCGAGCTCGGATCCATGTTCTGCTGACCACCA<br>AGAGAACCATGTTTCGTGTTCTGCTGGTG |
| 2   | Mut-S-R                    | CCACTGTGCTGGATATCTGCAGAATTCTCAGGTGTAGTG<br>CAGCTTCAC                    |
| 3   | nCov-SL18F-F               | GTGAGCAGCCAGTGCCTGAATTTACCACCAGAAC                                      |
| 4   | nCov-SL18F-R               | GTTCTGGTGGTCAAATTCACGCACTGGCTGCTCAC                                     |
| 5   | nCov-SHV69-<br>70del-F     | CGTGACCTGGTCCACGCCATCAGCGGCACCAATGGCAC<br>CAAGAG                        |
| 6   | nCov-SHV69-<br>70del-R     | CTCTTGGTGCCATTGGTGCCGCTGATGGCGTGGAACCAG<br>GTCACG                       |
| 7   | nCov-SY144del<br>antisense | CTCTTGTTGTTCTTATGATAAACACCCAGGAAAGGGTCAT                                |
| 8   | nCov-SY144del              | ATGACCCTTTCCTGGGTGTTTATCATAAGAACAACAAGAG                                |
| 9   | nCov-SA222V-F              | CAGGGCTTCAGCGTCCTGGAGCCTCTG                                             |
| 10  | nCov-SA222V-R              | CAGAGGCTCCAGGACGCTGAAGCCCTG                                             |
| 11  | nCov-S242-244del-<br>F     | ACCAGATTCCAGACCCTGCACAGATCATATCTTACAC                                   |
| 12  | nCov-S242-244del-<br>R     | GTGTAAGATATGATCTGTGCAGGGTCTGGAATCTGGT                                   |
| 13  | nCov-SK417N-<br>Fg1251t    | CAGGGCAGACCGGCAATATCGCCGAC                                              |
| 14  | nCov-SK417N-R              | GTCGGCGATATTGCCGGTCTGCCCTG                                              |
| 15  | nCov-SK417T-<br>Fa1250c    | GGGCAGACCGGCACGATCGCCGACTAC                                             |
| 16  | nCov-SK417T-R              | GTAGTCGGCGATCGTGCCGGTCTGCCC                                             |
| 17  | nCov-SN439K-F              | CGTGATCGCGTGGAAGTCTAAGAATCTAGATTGAAA                                    |
| 18  | nCov-SN439K-R              | TTTCGAATCTAGATTCTTAGAGTTCCACGCGATCACG                                   |
| 19  | nCov-SY453F-<br>Fa1358t    | GGCAATTACAATTACCTGTTTCAGACTGTTTCAGAAAGAGC                               |
| 20  | nCov-SY453F-R              | GCTCTTTCTGAACAGTCTGAACAGGTAATTGTAATTGCC                                 |
| 21  | nCov-SS477N-<br>FG1430A    | CTACCAGGCCGGCAACACACCCGTGTAATG                                          |
| 22  | nCov-SS477N-R              | CATTACACGGTGTGTTGCCGGCCTGGTAG                                           |
| 23  | nCov-ST478I-F              | TACCAGGCCGGCAGCATAACCGTGTAAATGG                                         |
| 24  | nCov-ST478I-R              | CCATTACACGGTATGCTGCCGGCCTGGTA                                           |
| 25  | nCov-SE484K-<br>Fg1450a    | CACCGTGTAAATGGCGTGAAGGGCTTCAATTGCTAC                                    |
| 26  | nCov-SE484K-R              | GTAGCAATTGAAGCCCTTCACGCCATTACACGGTG                                     |

**Table S4 continued. Primers used in the construction of mutated clones of SARS-CoV-2 S, related to Figure 1.**

| No. | Primer Name          | sequence                                                            |
|-----|----------------------|---------------------------------------------------------------------|
| 27  | nCov-SF486L-F        | ATGGCGTGGAGGGCTTAAATTGCTACTTCCCTC                                   |
| 28  | nCov-SF486L-R        | GAGGGAAGTAGCAATTTAAGCCCTCCACGCCAT                                   |
| 29  | nCov-SS494P-F        | TACTTCCCTCTGCAGCCCTACGGCTTCCAGCC                                    |
| 30  | nCov-SS494P-R        | GGCTGGAAGCCGTAGGGCTGCAGAGGGAAGTA                                    |
| 31  | nCov-SN501Y-Fa1501t  | GCTTCCAGCCTACCTATGGCGTG<br>GGCTAC                                   |
| 32  | nCov-SN501Y-R        | GTAGCCCACGCCATAGGTAGGCTGGAAGC                                       |
| 33  | nCov-SA570D-F        | CATCTGTGGTGTTCGTTCGATGTCTCTGCCG                                     |
| 34  | nCov-SA570D-R        | CGGCAGAGACATCGACGACACCACAGATG                                       |
| 35  | nCov-SE583D-F        | CCCTCAGACCCTGGATATCCTGGACATCACT                                     |
| 36  | nCov-SE583D-R        | AGTGATGTCCAGGATATCCAGGGTCTGAGGG                                     |
| 37  | H655Y-F              | GCCGGCTGCCTGATCGGCGCCGAGTACGTGAATAATAGC<br>TACGAGTGCGACATCCCTA      |
| 38  | H655Y-R              | TAGGGATGTTCGACTCGTAGCTATTATTACGTA<br>GACTCGGC<br>GCCGATCAGGCAGCCGGC |
| 39  | nCov-SP681H-F        | ACCCAGACCAATAGCCATAGAAGAGCCAGAAGC                                   |
| 40  | nCov-SP681H-R        | GCTTCTGGCTCTTCTATGGCTATTGGTCTGGGT                                   |
| 41  | nCov-ST716I-F        | TAGCATCGCCATCCCTATCAATTTACCATCAGCG                                  |
| 42  | nCov-ST716I-R        | CGCTGATGGTGAAATTGATAGGGATGGCGATGCTA                                 |
| 43  | nCov-SS982A-F        | GTACTCAACGATATCCTGGCCAGACTGGACAAGGTGGA                              |
| 44  | nCov-SS982A-R        | TCCACCTTGTCCAGTCTGGCCAGGATATCGTTGAGTAC                              |
| 45  | nCov-ST1027I-Fc3080t | CCAATCTGGCCGCCATCAAGATGAGCGAGTG                                     |
| 46  | nCov-ST1027I-R       | CACTCGCTCATCTTGATGGCGGCCAGATTGG                                     |
| 47  | nCov-SD1118H-F       | GCTCACGAAGGTATTGTGGGTGGTGTGATGATCTGAG                               |
| 48  | nCov-SD1118H-R       | CTCAGATCATCACCACCCACAATACCTTCGTGAGC                                 |
| 49  | nCov-SD1163Y-F       | CAAGAATCACACCAGCCCTTATGTGGACCTCGGTGATATTT                           |
| 50  | nCov-SD1163Y-R       | AAATATCACCGAGGTCCACATAAGGGCTGGTGTGATTCTTG                           |
| 51  | nCov-SV1176F-F       | TTCGGGAATCAATGCCAGCTTCGTGAATATCCAGAAGGAAA                           |
| 52  | nCov-SV1176F-R       | TTTCCTTCTGGATATTCACGAAGCTGGCATTGATTCCCGAA                           |
